# Supplementary material for: A Positive Association between Working Memory Capacity and Human Creativity: A Meta-Analytic Evidence
Source: MDPI journal article supplement (doi:10.3390/jintelligence11010015), 2023-01-13
Supplement: s1 [file s1]

Supplementary Materials for

Increased Working Memory Capacity Supports Human Creativity: A Meta-analytic Evidence

Contents

3 of 3 Supplementary Figures

| Groups                 |                | Effect size and 95% interval |             |             | Test of null (2-Tail) |         | Heterogeneity |        |         |           | Tau-squared |                |          |       |
|------------------------|----------------|------------------------------|-------------|-------------|-----------------------|---------|---------------|--------|---------|-----------|-------------|----------------|----------|-------|
| Group                  | Number Studies | Point estimate               | Lower limit | Upper limit | Z-value               | P-value | Q-value       | df (Q) | P-value | I-squared | Tau Squared | Standard Error | Variance | Tau   |
| Fixed effect analysis  |                |                              |             |             |                       |         |               |        |         |           |             |                |          |       |
| Asian                  | 30             | 0.126                        | 0.091       | 0.160       | 7.071                 | 0.000   | 43.020        | 29     | 0.045   | 32.589    | 0.005       | 0.004          | 0.000    | 0.069 |
| Western                | 20             | 0.061                        | 0.017       | 0.105       | 2.729                 | 0.006   | 22.480        | 19     | 0.261   | 15.480    | 0.002       | 0.004          | 0.000    | 0.044 |
| Total within           |                |                              |             |             |                       |         | 65.500        | 48     | 0.047   |           |             |                |          |       |
| Total between          |                |                              |             |             |                       |         | 5.181         | 1      | 0.023   |           |             |                |          |       |
| Overall                | 50             | 0.101                        | 0.073       | 0.128       | 7.230                 | 0.000   | 70.680        | 49     | 0.023   | 30.674    | 0.004       | 0.003          | 0.000    | 0.066 |
| Mixed effects analysis |                |                              |             |             |                       |         |               |        |         |           |             |                |          |       |
| Asian                  | 30             | 0.131                        | 0.086       | 0.175       | 5.707                 | 0.000   |               |        |         |           |             |                |          |       |
| Western                | 20             | 0.061                        | 0.011       | 0.110       | 2.389                 | 0.017   |               |        |         |           |             |                |          |       |
| Total between          |                |                              |             |             |                       |         | 4.260         | 1      | 0.039   |           |             |                |          |       |
| Overall                | 50             | 0.099                        | 0.066       | 0.132       | 5.832                 | 0.000   |               |        |         |           |             |                |          |       |

Figure S1. The results of the moderation-effect of culture.

| Groups                 |                | Effect size and 95% interval |             |             | Test of null (2-Tail) |         | Heterogeneity |        |         |           | Tau-squared |                |          |       |
|------------------------|----------------|------------------------------|-------------|-------------|-----------------------|---------|---------------|--------|---------|-----------|-------------|----------------|----------|-------|
| Group                  | Number Studies | Point estimate               | Lower limit | Upper limit | Z-value               | P-value | Q-value       | df (Q) | P-value | I-squared | Tau Squared | Standard Error | Variance | Tau   |
| Fixed effect analysis  |                |                              |             |             |                       |         |               |        |         |           |             |                |          |       |
| college student        | 48             | 0.078                        | 0.048       | 0.109       | 5.022                 | 0.000   | 85.988        | 47     | 0.000   | 45.341    | 0.010       | 0.005          | 0.000    | 0.099 |
| school-children        | 20             | 0.033                        | 0.002       | 0.063       | 2.083                 | 0.037   | 48.517        | 19     | 0.000   | 60.838    | 0.008       | 0.004          | 0.000    | 0.088 |
| Total within           |                |                              |             |             |                       |         | 134.505       | 66     | 0.000   |           |             |                |          |       |
| Total between          |                |                              |             |             |                       |         | 4.321         | 1      | 0.038   |           |             |                |          |       |
| Overall                | 68             | 0.055                        | 0.034       | 0.077       | 5.023                 | 0.000   | 138.826       | 67     | 0.000   | 51.738    | 0.009       | 0.003          | 0.000    | 0.095 |
| Mixed effects analysis |                |                              |             |             |                       |         |               |        |         |           |             |                |          |       |
| college student        | 48             | 0.083                        | 0.041       | 0.126       | 3.827                 | 0.000   |               |        |         |           |             |                |          |       |
| school-children        | 20             | 0.037                        | -0.016      | 0.089       | 1.380                 | 0.168   |               |        |         |           |             |                |          |       |
| Total between          |                |                              |             |             |                       |         | 1.822         | 1      | 0.177   |           |             |                |          |       |
| Overall                | 68             | 0.065                        | 0.032       | 0.098       | 3.838                 | 0.000   |               |        |         |           |             |                |          |       |

Figure S2. The results of the moderation-effect of age.

| Groups                 |                | Effect size and 95% interval |             |             | Test of null (2-Tail) |         | Heterogeneity |        |         |           | Tau-squared |                |          |       |
|------------------------|----------------|------------------------------|-------------|-------------|-----------------------|---------|---------------|--------|---------|-----------|-------------|----------------|----------|-------|
| Group                  | Number Studies | Point estimate               | Lower limit | Upper limit | Z-value               | P-value | Q-value       | df (Q) | P-value | I-squared | Tau Squared | Standard Error | Variance | Tau   |
| Fixed effect analysis  |                |                              |             |             |                       |         |               |        |         |           |             |                |          |       |
| dual                   | 18             | 0.131                        | 0.086       | 0.175       | 5.746                 | 0.000   | 56.157        | 17     | 0.000   | 69.728    | 0.023       | 0.013          | 0.000    | 0.150 |
| verbal                 | 13             | 0.100                        | 0.048       | 0.151       | 3.778                 | 0.000   | 17.505        | 12     | 0.132   | 31.448    | 0.004       | 0.006          | 0.000    | 0.067 |
| visual spatial         | 4              | 0.155                        | 0.075       | 0.234       | 3.770                 | 0.000   | 1.363         | 3      | 0.580   | 0.000     | 0.000       | 0.006          | 0.000    | 0.000 |
| Total within           |                |                              |             |             |                       |         | 75.625        | 32     | 0.000   |           |             |                |          |       |
| Total between          |                |                              |             |             |                       |         | 1.548         | 2      | 0.461   |           |             |                |          |       |
| Overall                | 35             | 0.123                        | 0.092       | 0.154       | 7.743                 | 0.000   | 77.173        | 34     | 0.000   | 55.943    | 0.012       | 0.005          | 0.000    | 0.108 |
| Mixed effects analysis |                |                              |             |             |                       |         |               |        |         |           |             |                |          |       |
| dual                   | 18             | 0.153                        | 0.067       | 0.237       | 3.458                 | 0.001   |               |        |         |           |             |                |          |       |
| verbal                 | 13             | 0.101                        | 0.034       | 0.168       | 2.936                 | 0.003   |               |        |         |           |             |                |          |       |
| visual spatial         | 4              | 0.155                        | 0.075       | 0.234       | 3.770                 | 0.000   |               |        |         |           |             |                |          |       |
| Total between          |                |                              |             |             |                       |         | 1.360         | 2      | 0.507   |           |             |                |          |       |
| Overall                | 35             | 0.131                        | 0.087       | 0.175       | 5.782                 | 0.000   |               |        |         |           |             |                |          |       |

Figure S3. The results of the moderation-effect of WMC types group.
